# Supplementary material for: A NAC-EXPANSIN module enhances maize kernel size by controlling nucellus elimination
Source: PubMed Central journal article supplement (PMC9522829; doi:10.1038/s41467-022-33513-4), 2022-09-29
Supplement: 41467_2022_33513_MOESM3_ESM.pdf [file 41467_2022_33513_MOESM3_ESM.pdf]

## **Description of Additional Supplementary Files**

File name: Supplementary Data 1

Description: Twenty-seven annotated genes were differentially expressed between HKW9<sup>Mc</sup> and HKW9<sup>V671</sup> within 73-Mb mapping region.

File name: Supplementary Data 2

Description: The maize inbred lines list in this study.

File name: Supplementary Data 3

Description: Primers and probes used in this study.
